# Supplementary material for: The HERrespect intervention to address violence against female garment workers in Bangladesh: study protocol for a quasi-experimental trial
Source: Springer Nature journal article supplement (doi:10.1186/s12889-018-5442-5), 2018-04-18
Supplement: MOESM1 [file 15703386]

# DRAFT

## Version - 2

### HERrespect Evaluation (ENGLISH)

## WORKER SURVEY QUESTIONNAIRE

### BASELINE

### Facesheet

|                        |       |
|------------------------|-------|
| 1. Factory ID          | _ _ _ |
| 2. Worker ID           | _ _   |
| 3. Interviewer ID      | _ _   |
| 4. Name of interviewer |       |

| Household visit form                                                                                                                                                                                                                  |                                                                                                                                                                                                                                  |                                                                                                                                                                                                                                   |                                                                                                                                                                                                                                  |                          |
|---------------------------------------------------------------------------------------------------------------------------------------------------------------------------------------------------------------------------------------|----------------------------------------------------------------------------------------------------------------------------------------------------------------------------------------------------------------------------------|-----------------------------------------------------------------------------------------------------------------------------------------------------------------------------------------------------------------------------------|----------------------------------------------------------------------------------------------------------------------------------------------------------------------------------------------------------------------------------|--------------------------|
|                                                                                                                                                                                                                                       | First visit                                                                                                                                                                                                                      | Second visit                                                                                                                                                                                                                      | Third visit                                                                                                                                                                                                                      |                          |
| Date<br>Result code *                                                                                                                                                                                                                 | _____<br><div style="display: flex; justify-content: center; gap: 10px;"> <div style="border: 1px solid black; width: 20px; height: 20px;"></div> <div style="border: 1px solid black; width: 20px; height: 20px;"></div> </div> | _____<br><div style="display: flex; justify-content: center; gap: 10px;"> <div style="border: 1px solid black; width: 20px; height: 20px;"></div> <div style="border: 1px solid black; width: 20px; height: 20px;"></div> </div>  | _____<br><div style="display: flex; justify-content: center; gap: 10px;"> <div style="border: 1px solid black; width: 20px; height: 20px;"></div> <div style="border: 1px solid black; width: 20px; height: 20px;"></div> </div> |                          |
| Date of next visit                                                                                                                                                                                                                    | _____<br><div style="display: flex; justify-content: center; gap: 10px;"> <div style="border: 1px solid black; width: 20px; height: 20px;"></div> <div style="border: 1px solid black; width: 20px; height: 20px;"></div> </div> | _____<br><div style="display: flex; justify-content: center; gap: 10px;"> <div style="border: 1px solid black; width: 20px; height: 20px;"></div> <div style="border: 1px solid black; width: 20px; height: 20px;"></div> </div>  | Total visit                                                                                                                                                                                                                      | <input type="checkbox"/> |
| Interview start time                                                                                                                                                                                                                  | <div style="display: flex; justify-content: space-between;"> <span> _  hr</span> <span> _  min</span> </div>                                                                                                                     | <div style="display: flex; justify-content: space-between;"> <span> _  hr</span> <span> _  min</span> </div>                                                                                                                      | <div style="display: flex; justify-content: space-between;"> <span> _  hr</span> <span> _  min</span> </div>                                                                                                                     |                          |
| Interview end time                                                                                                                                                                                                                    | <div style="display: flex; justify-content: space-between;"> <span> _  hr</span> <span> _  min</span> </div>                                                                                                                     | <div style="display: flex; justify-content: space-between;"> <span> _  hr</span> <span> _  min</span> </div>                                                                                                                      | <div style="display: flex; justify-content: space-between;"> <span> _  hr</span> <span> _  min</span> </div>                                                                                                                     |                          |
| Total duration of interview                                                                                                                                                                                                           | <div style="display: flex; justify-content: space-between;"> <span> _  hr</span> <span> _  min</span> </div>                                                                                                                     | <div style="display: flex; justify-content: space-between;"> <span> _  hr</span> <span> _  min</span> </div>                                                                                                                      | <div style="display: flex; justify-content: space-between;"> <span> _  hr</span> <span> _  min</span> </div>                                                                                                                     |                          |
| * Result code<br><br>Complete .....01<br>Refused.....02<br>Postponed (mention the reason)<br>.....03<br><br>Incomplete .....04                                                                                                        |                                                                                                                                                                                                                                  | Household destroyed/ Nobody lives at the house .....05<br>Respondent absent .....06<br>Refused to continue the interview (mention the reason) ..... 07<br><br>Others (mention the reason)<br>.....08                              |                                                                                                                                                                                                                                  |                          |
| SUPERVISOR ID <div style="display: flex; justify-content: center; gap: 10px;"> <div style="border: 1px solid black; width: 20px; height: 20px;"></div> <div style="border: 1px solid black; width: 20px; height: 20px;"></div> </div> |                                                                                                                                                                                                                                  | EDITOR ID <div style="display: flex; justify-content: center; gap: 10px;"> <div style="border: 1px solid black; width: 20px; height: 20px;"></div> <div style="border: 1px solid black; width: 20px; height: 20px;"></div> </div> |                                                                                                                                                                                                                                  |                          |

## SECTION 1: BACKGROUND & WORK

The first questions are about yourself, your home and your work situation. Please try and relax, there are no right or wrong answers. Remember that everything you answer will be kept secret.

| No.                                               | QUESTIONS AND FILTERS                                                                                | CODING CATEGORIES                                                                                                                                                                                                                                                                                                                                                                                                                                     | SKIP         |            |  |  |     |    |                                                   |   |   |                            |   |   |                          |   |   |                         |   |   |  |
|---------------------------------------------------|------------------------------------------------------------------------------------------------------|-------------------------------------------------------------------------------------------------------------------------------------------------------------------------------------------------------------------------------------------------------------------------------------------------------------------------------------------------------------------------------------------------------------------------------------------------------|--------------|------------|--|--|-----|----|---------------------------------------------------|---|---|----------------------------|---|---|--------------------------|---|---|-------------------------|---|---|--|
| 101                                               | How old are you?                                                                                     | AGE (YEARS) [ ] [ ]                                                                                                                                                                                                                                                                                                                                                                                                                                   |              |            |  |  |     |    |                                                   |   |   |                            |   |   |                          |   |   |                         |   |   |  |
| 102                                               | In which DISTRICT were you born?                                                                     | NAME OF THE DISTRICT                                                                                                                                                                                                                                                                                                                                                                                                                                  |              |            |  |  |     |    |                                                   |   |   |                            |   |   |                          |   |   |                         |   |   |  |
| 103                                               | How long have you lived in this community?                                                           | YEARS [ ] [ ]<br>(If less than 1 year enter 00)                                                                                                                                                                                                                                                                                                                                                                                                       |              |            |  |  |     |    |                                                   |   |   |                            |   |   |                          |   |   |                         |   |   |  |
| 104                                               | Have you ever moved or travelled to look for work?                                                   | YES.....1<br>NO.....2                                                                                                                                                                                                                                                                                                                                                                                                                                 |              |            |  |  |     |    |                                                   |   |   |                            |   |   |                          |   |   |                         |   |   |  |
| 105                                               | Can you read and write?                                                                              | NO.....0<br>CAN READ ONLY .....1<br>CAN WRITE ONLY .....2<br>CAN READ AND WRITE.....3                                                                                                                                                                                                                                                                                                                                                                 |              |            |  |  |     |    |                                                   |   |   |                            |   |   |                          |   |   |                         |   |   |  |
| 106                                               | Have you ever attended school/ madrasha or any other institution for study?                          | YES, SCHOOL.....1<br>YES, MADRASHA .....2<br>YES, BOTH.....3<br>NO .....4<br>OTHER (Specify) .....5                                                                                                                                                                                                                                                                                                                                                   | →108<br>→108 |            |  |  |     |    |                                                   |   |   |                            |   |   |                          |   |   |                         |   |   |  |
| 107                                               | What is the highest educational level you completed?                                                 | CLASS ..... [ ] [ ]                                                                                                                                                                                                                                                                                                                                                                                                                                   |              |            |  |  |     |    |                                                   |   |   |                            |   |   |                          |   |   |                         |   |   |  |
| 108                                               | Are you a member of the following organizations?                                                     | <table border="1"> <thead> <tr> <th></th><th colspan="2">Membership</th></tr> <tr> <th></th><th>YES</th><th>NO</th></tr> </thead> <tbody> <tr> <td>a) NGO based microcredit and savings organization</td><td>1</td><td>2</td></tr> <tr> <td>b) NGO based savings group</td><td>1</td><td>2</td></tr> <tr> <td>c) Non-NGO savings group</td><td>1</td><td>2</td></tr> <tr> <td>x) Other NGOs (Specify)</td><td>1</td><td>2</td></tr> </tbody> </table> |              | Membership |  |  | YES | NO | a) NGO based microcredit and savings organization | 1 | 2 | b) NGO based savings group | 1 | 2 | c) Non-NGO savings group | 1 | 2 | x) Other NGOs (Specify) | 1 | 2 |  |
|                                                   | Membership                                                                                           |                                                                                                                                                                                                                                                                                                                                                                                                                                                       |              |            |  |  |     |    |                                                   |   |   |                            |   |   |                          |   |   |                         |   |   |  |
|                                                   | YES                                                                                                  | NO                                                                                                                                                                                                                                                                                                                                                                                                                                                    |              |            |  |  |     |    |                                                   |   |   |                            |   |   |                          |   |   |                         |   |   |  |
| a) NGO based microcredit and savings organization | 1                                                                                                    | 2                                                                                                                                                                                                                                                                                                                                                                                                                                                     |              |            |  |  |     |    |                                                   |   |   |                            |   |   |                          |   |   |                         |   |   |  |
| b) NGO based savings group                        | 1                                                                                                    | 2                                                                                                                                                                                                                                                                                                                                                                                                                                                     |              |            |  |  |     |    |                                                   |   |   |                            |   |   |                          |   |   |                         |   |   |  |
| c) Non-NGO savings group                          | 1                                                                                                    | 2                                                                                                                                                                                                                                                                                                                                                                                                                                                     |              |            |  |  |     |    |                                                   |   |   |                            |   |   |                          |   |   |                         |   |   |  |
| x) Other NGOs (Specify)                           | 1                                                                                                    | 2                                                                                                                                                                                                                                                                                                                                                                                                                                                     |              |            |  |  |     |    |                                                   |   |   |                            |   |   |                          |   |   |                         |   |   |  |
| 109                                               | What is your current marital status?                                                                 | CURRENTLY MARRIED, LIVING TOGETHER.....1<br>CURRENTLY MARRIED, NOT LIVING TOGETHER.....2<br>SEPARATED.....3<br>DESERTED.....4<br>DIVORCED.....5<br>WIDOW.....6                                                                                                                                                                                                                                                                                        | → END INT.   |            |  |  |     |    |                                                   |   |   |                            |   |   |                          |   |   |                         |   |   |  |
| 110                                               | How long have you been married? (Or how long were you married for?)                                  | [ ] YEARS<br>(ENTER 00, IF LESS THAN 1 YEAR)                                                                                                                                                                                                                                                                                                                                                                                                          |              |            |  |  |     |    |                                                   |   |   |                            |   |   |                          |   |   |                         |   |   |  |
| 111                                               | How many times have you been married?                                                                | TIMES [ ]<br>IF MARRIED ONCE GO TO Q 113                                                                                                                                                                                                                                                                                                                                                                                                              |              |            |  |  |     |    |                                                   |   |   |                            |   |   |                          |   |   |                         |   |   |  |
| 112                                               | Did you have a previous marriage that ended in divorce or widowhood?                                 | WIDOWHOOD.....1<br>DIVORCE... .....2                                                                                                                                                                                                                                                                                                                                                                                                                  |              |            |  |  |     |    |                                                   |   |   |                            |   |   |                          |   |   |                         |   |   |  |
| 113                                               | Are you related to your husband?                                                                     | NO.....0<br>YES, COUSINS.....1<br>YES, OTHER RELATIVE.....2                                                                                                                                                                                                                                                                                                                                                                                           |              |            |  |  |     |    |                                                   |   |   |                            |   |   |                          |   |   |                         |   |   |  |
| 114                                               | How old were you when you married (or were first married, if there has been more than one marriage)? | [ ] AGE IN YEARS                                                                                                                                                                                                                                                                                                                                                                                                                                      |              |            |  |  |     |    |                                                   |   |   |                            |   |   |                          |   |   |                         |   |   |  |
| 115                                               | How many children do you have now?                                                                   | [ ] [ ]                                                                                                                                                                                                                                                                                                                                                                                                                                               |              |            |  |  |     |    |                                                   |   |   |                            |   |   |                          |   |   |                         |   |   |  |

## WORK AND MONEY

The next questions are about money and food. Sometimes some families face shortage of money and food. We would like to know about your family's experience.

|     |                                                                                                                                 |                                                                                                                                        |
|-----|---------------------------------------------------------------------------------------------------------------------------------|----------------------------------------------------------------------------------------------------------------------------------------|
| 116 | In the past 4 weeks, how often was there no food to eat of any kind in your house because of a lack of money?                   | OFTEN.....1<br>SOMETIMES.....2<br>RARELY.....3<br>NEVER.....4                                                                          |
| 117 | In the past 4 weeks how often did you or any member of your household go to sleep hungry because of lack of food?               | OFTEN.....1<br>SOMETIMES.....2<br>RARELY.....3<br>NEVER.....4                                                                          |
| 118 | In the past 4 weeks how often did you or any of your household go a whole day and night without eating because of lack of food? | OFTEN.....1<br>SOMETIMES.....2<br>RARELY.....3<br>NEVER.....4                                                                          |
| 119 | How often in the past 4 weeks have you had to borrow food or money because you did not have enough?                             | EVERYDAY.....1<br>MORE THAN ONCE A WEEK .....2<br>ALMOST EVERY WEEK .....3<br>ONCE OR TWICE IN THE LAST 4 WEEKS .....4<br>NEVER .....5 |
| 120 | If you had an emergency at home and needed 50,000 Tk, how easy would you say it would be to find the money?                     | VERY DIFFICULT.....1<br>SOMEWHAT DIFFICULT.....2<br>FAIRLY EASY.....3<br>VERY EASY .....4                                              |
| 121 | Considering all the money you earned from work or any other sources (such as selling things), how much did you earn last month? | _____ TK                                                                                                                               |
| 122 | How many Tk did you save in the last 4 weeks?                                                                                   | Tk _____<br>(If none write 00)                                                                                                         |
| 123 | How many Tk have you got in savings?                                                                                            | Tk _____<br>(If none write 00)                                                                                                         |

## SECTION 2: WORK AND STRESS

|     |                                                                                                              |                                                                                                                                                                                                                                                                                                                                                                                                                                                                                                      |       |
|-----|--------------------------------------------------------------------------------------------------------------|------------------------------------------------------------------------------------------------------------------------------------------------------------------------------------------------------------------------------------------------------------------------------------------------------------------------------------------------------------------------------------------------------------------------------------------------------------------------------------------------------|-------|
| 201 | For how long you have been working in the current factory?                                                   | [ ] [ ] year                      [ ] [ ] months                                                                                                                                                                                                                                                                                                                                                                                                                                                     |       |
| 202 | What position do you hold in the factory?                                                                    | HELPER.....1<br>JUNIOR SEWING OPERATOR.....2<br>OPERATOR.....3<br>SENIOR SEWING OPERATOR .....4<br>QUALITY INSPECTOR.....5<br>REPORTER.....6<br>PRODUCTION REPORTER.....7<br>FUSING HELPER.....8<br>FUSING OPERATOR.....9<br>FOLDING MAN.....10<br>FOLDING OPERATOR.....11<br>CUTTER MAN.....12<br>NIDDLE MAN.....13<br>PACKING MAN.....14<br>HOUSE KEEPING.....15<br>CANTEEN GIRL.....16<br>IRON GIRL.....17<br>ISSUE GIRL.....18<br>SAMPLE ASST.....19<br>SPOT MAN.....20<br>OTHER (SPECIFY.....21 |       |
| 203 | How long you have been working in this position?                                                             | [ ] [ ] year                      [ ] [ ] months                                                                                                                                                                                                                                                                                                                                                                                                                                                     |       |
| 204 | Did you worked in other garment factories previously?                                                        | YES .....1<br>NO .....2                                                                                                                                                                                                                                                                                                                                                                                                                                                                              | → 206 |
| 205 | In total, how many garment factories have you worked in (including the current one)?                         | [ ] [ ]                                                                                                                                                                                                                                                                                                                                                                                                                                                                                              |       |
| 206 | For how long you have been working in the garment sector?                                                    | [ ] [ ] year                      [ ] [ ] months                                                                                                                                                                                                                                                                                                                                                                                                                                                     |       |
| 207 | Did you ever have any occupation other than garment work?                                                    | YES .....1<br>NO .....2                                                                                                                                                                                                                                                                                                                                                                                                                                                                              |       |
| 208 | On average how much do you earn per month?                                                                   | TK _____                                                                                                                                                                                                                                                                                                                                                                                                                                                                                             |       |
| 209 | In that last three months, have you ever not been paid your proper monthly wage?                             | YES .....1<br>NO .....2                                                                                                                                                                                                                                                                                                                                                                                                                                                                              |       |
| 210 | In the last three months, have you been allowed time off work for medical appointments or domestic problems? | YES, I WANTED AND IT WAS GRANTED.....1<br>WANTED AND MOST OF TIME IT WAS GRANTED.....2<br>WANTED AND MOST OF TIME IT WAS REFUSED.....3<br>WNATED AND NEVER GRANTED.....4<br>HALF OF THE TIME IT WAS GRANTED AND HALF OF THE TIME IT WAS REFUSED.....5<br>NO I WANTED TO ASK BUT DID NOT ASK .....6<br>I DID NOT NEED IT .....7                                                                                                                                                                       |       |
| 211 | Do you have a letter of appointment?                                                                         | YES .....1<br>NO .....2                                                                                                                                                                                                                                                                                                                                                                                                                                                                              |       |
| 212 | What is the share of your contribution to your household income?                                             | FULL (100) .....1<br>MORE THAN HALF.....2<br>HALF.....3<br>LESS THAN HALF.....4                                                                                                                                                                                                                                                                                                                                                                                                                      |       |

|     |                                                                                                                                                                                   |                                                                                                                            |          |       |                |
|-----|-----------------------------------------------------------------------------------------------------------------------------------------------------------------------------------|----------------------------------------------------------------------------------------------------------------------------|----------|-------|----------------|
| 213 | Would you say that the money that you bring into the family is more than what your husband contributes, less than what he contributes, or about the same as he contributes?       | MORE THAN HUSBAND.....1<br>LESS THAN HUSBAND.....2<br>ABOUT THE SAME .....3<br>HUSBAND PAYS ALL .....4<br>I PAY ALL .....5 |          |       |                |
| 214 | How long have you been earning an income?                                                                                                                                         | [ ] [ ] YEARS                                                                                                              |          |       |                |
| 215 | The following statements are a series of statements about your current work situation. Please say if you strongly agree, agree, disagree or strongly disagree with these phrases: | STRONGLY DISAGREE                                                                                                          | DISAGREE | AGREE | STRONGLY AGREE |
|     | a) You are frequently stressed or depressed because of not having enough income                                                                                                   | 1                                                                                                                          | 2        | 3     | 4              |
|     | b) You are frequently stressed or depressed because you are not proud of what you do to get money                                                                                 | 1                                                                                                                          | 2        | 3     | 4              |
|     | c) You are frequently stressed or depressed because you want or have to help your family with money                                                                               | 1                                                                                                                          | 2        | 3     | 4              |

### SECTION 3: HEALTH AND WELLBEING

We would now like to ask you some questions about your health and well-being.

The next few questions are about how you have been feeling in the past week. Each question is a statement; please answer how many days you have had particular feelings or ideas or whether you have not had them at all. There are four options: rarely or never, some or a little of the time, a moderate amount of time, or most or all of the time.

| 301 | CES-D SCALE                                                                                            | RARELY<br>OR NONE<br>OF THE<br>TIME | SOME OR<br>A LITTLE<br>OF THE<br>TIME (1-2<br>DAYS) | MODERATE<br>AMOUNT<br>OF TIME (3-<br>4 DAYS) | MOST OR ALL<br>OF THE TIME<br>(5-7 DAYS) |
|-----|--------------------------------------------------------------------------------------------------------|-------------------------------------|-----------------------------------------------------|----------------------------------------------|------------------------------------------|
| A   | During the past week you were bothered by things that usually don't bother you                         | 0                                   | 1                                                   | 2                                            | 3                                        |
| B   | During the past week you did not feel like eating, your appetite was poor                              | 0                                   | 1                                                   | 2                                            | 3                                        |
| C   | During the past week you felt you could not cheer yourself up even with the help of family and friends | 0                                   | 1                                                   | 2                                            | 3                                        |
| D   | During the past week you felt you were just as good as other people                                    | 0                                   | 1                                                   | 2                                            | 3                                        |
| E   | During the past week you had trouble keeping your mind on what you were doing                          | 0                                   | 1                                                   | 2                                            | 3                                        |
| F   | During the past week you felt depressed                                                                | 0                                   | 1                                                   | 2                                            | 3                                        |
| G   | During the past week you felt that everything you did was an effort                                    | 0                                   | 1                                                   | 2                                            | 3                                        |
| H   | During the past week you felt hopeful about the future                                                 | 0                                   | 1                                                   | 2                                            | 3                                        |
| I   | During the past week you thought your life had been a failure                                          | 0                                   | 1                                                   | 2                                            | 3                                        |
| J   | During the past week you felt fearful                                                                  | 0                                   | 1                                                   | 2                                            | 3                                        |
| K   | During the past week your sleep was restless                                                           | 0                                   | 1                                                   | 2                                            | 3                                        |
| L   | During the past week you were happy                                                                    | 0                                   | 1                                                   | 2                                            | 3                                        |
| M   | During the past week you talked less than usual                                                        | 0                                   | 1                                                   | 2                                            | 3                                        |
| N   | During the past week you felt lonely                                                                   | 0                                   | 1                                                   | 2                                            | 3                                        |
| O   | During the past week people were unfriendly                                                            | 0                                   | 1                                                   | 2                                            | 3                                        |
| P   | During the past week you enjoyed life                                                                  | 0                                   | 1                                                   | 2                                            | 3                                        |
| Q   | During the past week you had crying spells                                                             | 0                                   | 1                                                   | 2                                            | 3                                        |
| R   | During the past week you felt sick                                                                     | 0                                   | 1                                                   | 2                                            | 3                                        |
| S   | During the past week you felt that people dislike you                                                  | 0                                   | 1                                                   | 2                                            | 3                                        |
| T   | During the past week you could not get 'going'                                                         | 0                                   | 1                                                   | 2                                            | 3                                        |
| 302 | In the past <u>four weeks</u> , has the thought of ending your life been in your mind?                 | YES).....1<br>NO.....2              |                                                     |                                              |                                          |

Next we would like to ask you about how you feel about yourself generally.

I'll read out a list of statements about your general feelings about yourself. Please say whether you strongly agree, agree, disagree or strongly disagree with the following statements

| 303 | Rosenberg Self-Esteem Scale                                                     | STRONGLY<br>DISAGREE | DISAGREE | AGREE | STRONGLY<br>AGREE |
|-----|---------------------------------------------------------------------------------|----------------------|----------|-------|-------------------|
| A   | On the whole, you are satisfied with yourself                                   | 1                    | 2        | 3     | 4                 |
| B   | At times, You think you are no good at all                                      | 1                    | 2        | 3     | 4                 |
| C   | You feel that you have a number of good qualities                               | 1                    | 2        | 3     | 4                 |
| D   | You are able to do things as well as most other people                          | 1                    | 2        | 3     | 4                 |
| E   | You feel you do not have much to be proud of                                    | 1                    | 2        | 3     | 4                 |
| F   | You certainly feel useless at times                                             | 1                    | 2        | 3     | 4                 |
| G   | You feel that you are a person of worth, at least on an equal plane with others | 1                    | 2        | 3     | 4                 |
| H   | You wish to have more respect for yourself                                      | 1                    | 2        | 3     | 4                 |
| I   | All in all, you are inclined to feel that you are a failure                     | 1                    | 2        | 3     | 4                 |

| J   | You take a positive attitude toward yourself                                       |                   | 1        | 2                         | 3     | 4              |
|-----|------------------------------------------------------------------------------------|-------------------|----------|---------------------------|-------|----------------|
| 304 | The following statements are series of statements about how you see your life now: | STRONGLY DISAGREE | DISAGREE | NEITHER AGREE OR DISAGREE | AGREE | STRONGLY AGREE |
|     | a) In most ways your life is close to your ideal                                   | 1                 | 2        | 3                         | 4     | 5              |
|     | b) The conditions of your life are excellent                                       | 1                 | 2        | 3                         | 4     | 5              |
|     | c) You are satisfied with your life                                                | 1                 | 2        | 3                         | 4     | 5              |
|     | d) So far you have got the important things you wanted in life                     | 1                 | 2        | 3                         | 4     | 5              |

## SECTION 4 ATTITUDES ABOUT RELATIONS BETWEEN MEN AND WOMEN

The next sets of questions are about your views on life and particularly on relations between men and women in society. There are no right or wrong answers – we are just interested in what you think.

Now, I'll read out some statements. Please say whether you strongly agree, agree, disagree or strongly disagree with each of the statements

| 401 |                                                                                                               | STRONGLY<br>DISAGREE | DISAGREE | AGREE | STRONGLY<br>AGREE |
|-----|---------------------------------------------------------------------------------------------------------------|----------------------|----------|-------|-------------------|
| A   | A woman's most important role is to take care of her home and cook for her family                             | 1                    | 2        | 3     | 4                 |
| B   | Men need sex more than women do                                                                               | 1                    | 2        | 3     | 4                 |
| C   | There are times when a woman deserves to be beaten                                                            | 1                    | 2        | 3     | 4                 |
| D   | It is a woman's responsibility to avoid getting pregnant                                                      | 1                    | 2        | 3     | 4                 |
| E   | A woman should tolerate violence in order to keep her family together                                         | 1                    | 2        | 3     | 4                 |
| F   | I think that a woman should obey her husband                                                                  | 1                    | 2        | 3     | 4                 |
| G   | I think that a woman needs her husband's permission to do paid work                                           | 1                    | 2        | 3     | 4                 |
| H   | I think that a woman cannot refuse to have sex with her husband                                               | 1                    | 2        | 3     | 4                 |
| I   | I think if a woman does not physically fight back, it's not rape                                              | 1                    | 2        | 3     | 4                 |
| J   | I think that men should share the work around the house with women such as doing dishes, cleaning and cooking | 1                    | 2        | 3     | 4                 |
| K   | I think that children belong to a man and his family                                                          | 1                    | 2        | 3     | 4                 |
| L   | I think that if a wife does something wrong her husband has the right to punish her                           | 1                    | 2        | 3     | 4                 |
| 402 | In your opinion, does a man have good reason to hit his wife if –                                             |                      |          |       |                   |
|     | a) She does not complete her household work to his satisfaction                                               | 1                    | 2        | 3     | 4                 |
|     | b) She disobeys him                                                                                           | 1                    | 2        | 3     | 4                 |
|     | c) She refuses to have sexual relations with him                                                              | 1                    | 2        | 3     | 4                 |
|     | d) She asks him whether he has other girlfriend                                                               | 1                    | 2        | 3     | 4                 |
|     | e) He suspects that she is unfaithful                                                                         | 1                    | 2        | 3     | 4                 |
|     | f) He finds out that she has been unfaithful                                                                  | 1                    | 2        | 3     | 4                 |



### SECTION 5 CURRENT HUSBAND

| No.  | QUESTIONS & FILTERS                                                                                                                                                                                                                                                                                 | CODING CATEGORIES                                                                                                                                                                        |     |    | SKIP TO |
|------|-----------------------------------------------------------------------------------------------------------------------------------------------------------------------------------------------------------------------------------------------------------------------------------------------------|------------------------------------------------------------------------------------------------------------------------------------------------------------------------------------------|-----|----|---------|
| 501  | I would now like you to tell me a little about your <u>current</u> husband.<br><br>How old is your husband?<br>PROBE: MORE OR LESS                                                                                                                                                                  | AGE (YEARS)..... [   ] [   ]                                                                                                                                                             |     |    |         |
| 502  | Do you and he both have the same level of education or do you have more schooling or does he have more schooling?                                                                                                                                                                                   | SAME .....1<br>YOU ARE MORE EDUCATED .....2<br>HE IS MORE EDUCATE .....3                                                                                                                 |     |    |         |
| 503a | Does your husband drink alcohol? (EVER)                                                                                                                                                                                                                                                             | YES.....1<br>NO.....2<br>DO NOT KNOW.....3                                                                                                                                               |     |    | → 506   |
| 503  | During the past 12 months, how often does your husband drink alcohol?<br><br>1. Most days<br>2. Weekly<br>3. Once a month<br>4. Less than once a month<br>5. Never<br>(Probe : if she says she doesn't know – ask how often she has known that he has had a drink of alcohol)                       | MOST DAYS .....1<br>WEEKLY.....2<br>ONCE A MONTH.....3<br>LESS THAN ONCE A MONTH.....4<br>NEVER.....5<br>REFUSED/NO ANSWER.....9                                                         |     |    | ⇒506    |
| 504  | In the <u>past 12 months</u> , how often have you seen your husband drunk? Would you say most days, weekly, once a month, less than once a month, or never?                                                                                                                                         | MOST DAYS.....1<br>WEEKLY.....2<br>ONCE A MONTH.....3<br>LESS THAN ONCE A MONTH.....4<br>NEVER.....5<br>REFUSED/NO ANSWER.....9                                                          |     |    |         |
| 505  | In the <u>past 12 months</u> , have you experienced any of the following problems, related to your husband drinking?<br>a) Money problems<br>b) Family problems<br>x) Any other problems, specify                                                                                                   |                                                                                                                                                                                          | YES | NO |         |
|      |                                                                                                                                                                                                                                                                                                     | a) MONEY PROBLEMS                                                                                                                                                                        | 1   | 2  |         |
|      |                                                                                                                                                                                                                                                                                                     | b) FAMILY PROBLEMS                                                                                                                                                                       | 1   | 2  |         |
|      |                                                                                                                                                                                                                                                                                                     | x) OTHER                                                                                                                                                                                 | 1   | 2  |         |
| 506  | Does your husband ever use drugs? Would you say:<br><br>1. Nearly every day<br>2. 1–3 times a week<br>3. 1–3 times a month<br>4. Occasionally, less than once a month<br>5. In the past, not now<br><br>(Probe : if she says she doesn't know – ask how often she has known that he has used drugs) | NEARLY EVERY DAY.....1<br>1–3 TIMES A WEEK.....2<br>1 – 3 TIMES IN A MONTH.....3<br>LESS THAN ONCE A MONTH.....4<br>NEVER.....5<br>IN THE PAST, NOT NOW.....6<br>REFUSED/NO ANSWER.....9 |     |    |         |
| 507  | In the <u>past 12 months</u> , he ever been involved in a physical fight with another man? Has this happened once or twice, a few times, many times or never?                                                                                                                                       | NEVER.....1<br>ONCE OR TWICE.....2<br>A FEW (3-5) TIMES.....3<br>MANY (MORE THAN 5) TIMES.....4<br>DON'T KNOW /DON'T REMEMBER.....8                                                      |     |    |         |
| 508  | Has your <u>current</u> husband had a relationship with any other women while being with you?                                                                                                                                                                                                       | YES .....1<br>NO.....2<br>MAY HAVE.....3                                                                                                                                                 |     |    |         |

|     |                                                                                              |                                                                             |  |
|-----|----------------------------------------------------------------------------------------------|-----------------------------------------------------------------------------|--|
| 509 | Does your husband have any other wives while being married (having a relationship) with you? | YES .....1<br>NO.....2<br>DON'T KNOW/DON'T REMEMBER.....8                   |  |
| 510 | How many wives does he have (including yourself)?                                            | NUMBER OF WIVES [   ][   ]<br><br>DON'T KNOW/DON'T REMEMBER.....98          |  |
| 511 | Has your <u>current</u> husband had children with any other woman while being with you?      | YES.....1<br>NO.....2<br>MAY HAVE.....3<br>DON'T KNOW /DON'T REMEMBER.....8 |  |

## SECTION 6: INTIMATE RELATIONSHIP

When two people marry, they usually share both good and bad moments. I would now like to ask you some questions about your current relationships and how your husband treats you. If anyone interrupts us I will change the topic of conversation. I would again like to assure you that your answers will be kept secret, and that you do not have to answer any questions that you do not want to. May I continue?

| No. | QUESTIONS & FILTERS                                                                                                                           | CODING CATEGORIES                                              | SKIP TO |
|-----|-----------------------------------------------------------------------------------------------------------------------------------------------|----------------------------------------------------------------|---------|
| 601 | In your relationship with your <u>current</u> husband, how often would you say that you quarrelled? Would you say rarely, sometimes or often? | NEVER.....1<br>RARELY .....2<br>SOMETIMES.....3<br>OFTEN.....4 |         |

The next set of statements are about your relationship with your current husband, please say for each if you strongly agree, agree, disagree or strongly disagree:

| 602 | RELATIONSHIP CONTROL SCALE                                                                          | STRONGLY DISAGREE | DISAGREE | AGREE | STRONGLY AGREE |
|-----|-----------------------------------------------------------------------------------------------------|-------------------|----------|-------|----------------|
|     | a) When he wants sex he expects you to agree                                                        | 1                 | 2        | 3     | 4              |
|     | b) If you asked him to use a condom, he would get angry                                             | 1                 | 2        | 3     | 4              |
|     | c) He won't let you wear certain things                                                             | 1                 | 2        | 3     | 4              |
|     | d) He has more to say than you do about important decisions that affect both of you                 | 1                 | 2        | 3     | 4              |
|     | e) He tells you who you can spend time with                                                         | 1                 | 2        | 3     | 4              |
|     | f) When you wear things to make you look beautiful he thinks you may be trying to attract other men | 1                 | 2        | 3     | 4              |
|     | g) He wants to know where you are all of the time                                                   | 1                 | 2        | 3     | 4              |
|     | h) He lets you know you are not the only partner he could have                                      | 1                 | 2        | 3     | 4              |
|     | i) He gets angry with you when you are late home from the factory                                   | 1                 | 2        | 3     | 4              |
|     | j) He threatens to stop allowing you to work                                                        | 1                 | 2        | 3     | 4              |

The next few questions are things that your may have experienced from your current husband.

| 603 | In the past 12 months, how many times your current husband has                                                                           | NEVER | ONCE | FEW TIMES | MANY TIMES |
|-----|------------------------------------------------------------------------------------------------------------------------------------------|-------|------|-----------|------------|
|     | a) Prohibited you from getting a job, going to work, trading, earning money or participating in income generation activities?            | 0     | 1    | 2         | 3          |
|     | b) Took your earnings, jewellery or any valuable things from you against your will?                                                      | 0     | 1    | 2         | 3          |
|     | c) Refused to give you money you needed for household expenses even when he has money for other things (such as alcohol and cigarettes)? | 0     | 1    | 2         | 3          |
|     | d) Threw you out of house?                                                                                                               | 0     | 1    | 2         | 3          |
|     | e) Did not work despite his capacity to earn?                                                                                            | 0     | 1    | 2         | 3          |
|     | f) Insisted you to surrender your earnings partially or fully either to him or to an in-law?                                             | 0     | 1    | 2         | 3          |
|     | g) Did not allow you to spend your own earnings without his permission.                                                                  | 0     | 1    | 2         | 3          |

|                                                                                                                                  |                                                                                                                                                                                                                                                  |                                                                                            |      |           |            |
|----------------------------------------------------------------------------------------------------------------------------------|--------------------------------------------------------------------------------------------------------------------------------------------------------------------------------------------------------------------------------------------------|--------------------------------------------------------------------------------------------|------|-----------|------------|
| The next questions are about things that happen to many women, and that your <b><u>current husband</u></b> may have done to you. |                                                                                                                                                                                                                                                  |                                                                                            |      |           |            |
| 604                                                                                                                              | In the past 12 months, how many times your current husband has                                                                                                                                                                                   | NEVER                                                                                      | ONCE | FEW TIMES | MANY TIMES |
|                                                                                                                                  | a) Insulted you or made you feel bad about yourself?                                                                                                                                                                                             | 0                                                                                          | 1    | 2         | 3          |
|                                                                                                                                  | b) Belittled or humiliated you in front of other people?                                                                                                                                                                                         | 0                                                                                          | 1    | 2         | 3          |
|                                                                                                                                  | c) Done things to scare or intimidate you on purpose (e.g. by the way he looked at you, by yelling and smashing things)?                                                                                                                         | 0                                                                                          | 1    | 2         | 3          |
|                                                                                                                                  | d) Threatened to hurt you?                                                                                                                                                                                                                       | 0                                                                                          | 1    | 2         | 3          |
|                                                                                                                                  | e) Hurt people you care about as a way of hurting you, or damaged things of importance to you?                                                                                                                                                   | 0                                                                                          | 1    | 2         | 3          |
|                                                                                                                                  | Some women find these questions hard to answer, others easy. Remember everything you share here will only be used for research purposes and will be kept secret. We are interested now in your relationship with <b><u>current husband</u></b> . |                                                                                            |      |           |            |
| 605                                                                                                                              | In the past 12 months, how many times your current husband has                                                                                                                                                                                   | NEVER                                                                                      | ONCE | FEW TIMES | MANY TIMES |
|                                                                                                                                  | a) Slapped you or thrown something at you that could hurt you?                                                                                                                                                                                   | 0                                                                                          | 1    | 2         | 3          |
|                                                                                                                                  | b) Pushed you or shoved you or pulled your hair?                                                                                                                                                                                                 | 0                                                                                          | 1    | 2         | 3          |
|                                                                                                                                  | c) Hit you with his fist or with something else that could hurt you?                                                                                                                                                                             | 0                                                                                          | 1    | 2         | 3          |
|                                                                                                                                  | d) Kicked, dragged, beaten, choked or burnt you?                                                                                                                                                                                                 | 0                                                                                          | 1    | 2         | 3          |
|                                                                                                                                  | e) Threatened with or actually used a gun, knife or other weapon against you?                                                                                                                                                                    | 0                                                                                          | 1    | 2         | 3          |
| CHECK 6A                                                                                                                         | Check if - 1 or 2 or 3 is marked in Q605 (a-e) ..... 1<br>Check - if 0 is marked in all Q605 (a-e) .....2                                                                                                                                        |                                                                                            |      |           |            |
| The next few questions are about things you may have experienced with your <b><u>current husband</u></b>                         |                                                                                                                                                                                                                                                  |                                                                                            |      |           |            |
| 606                                                                                                                              | How would you describe your sexual relationship with your <b><u>current</u></b> husband?                                                                                                                                                         | VERY SATISFYING.....1<br>SATISFYING.....2<br>UNSATISFYING.....3<br>VERY UNSATISFYING.....4 |      |           |            |
| 607                                                                                                                              |                                                                                                                                                                                                                                                  | NEVER                                                                                      | ONCE | FEW TIMES | MANY TIMES |
|                                                                                                                                  | a) In the past 12 months, how many times your current husband has physically forced you to have sexual intercourse when you did not want to?                                                                                                     | 0                                                                                          | 1    | 2         | 3          |
|                                                                                                                                  | b) In the past 12 months, how many times has your current husband used threats or intimidation to get you to have sex when you did not want to?                                                                                                  | 0                                                                                          | 1    | 2         | 3          |
|                                                                                                                                  | c) In the past 12 months, how many times did you have sexual intercourse you did not want to because you were afraid of what your husband might do?                                                                                              | 0                                                                                          | 1    | 2         | 3          |
|                                                                                                                                  | d) In the last 12 months, how many times current husband has forced you to do something sexual that you found degrading or humiliating?                                                                                                          | 0                                                                                          | 1    | 2         | 3          |
|                                                                                                                                  | e) In the last 12 months, how many times your current husband has forced you to watch pornography when you did not want to?                                                                                                                      | 0                                                                                          | 1    | 2         | 3          |
| CHECK 6B                                                                                                                         | Check if - 1 or 2 or 3 is marked in Q604 (a-e) ..... 1<br>Check - if 0 is marked in all Q604 (a-e) .....2                                                                                                                                        |                                                                                            |      |           |            |
| CHECK 6C                                                                                                                         | WOMAN EXPERIENCED PHYSICAL OR SEXUAL VIOLENCE (1 circled in CHECK 6A OR CHECK 6B).....1<br><br>WOMAN HAS NOT EXPERIENCED ANY PHYSICAL OR SEXUAL VIOLENCE ONLY (2 circled in both CHECK 6A and CHECK 6B).....2                                    |                                                                                            |      |           | → 609      |

|     |                                                                             |                               |                                                                                                                                                                                                                                                           |    |  |
|-----|-----------------------------------------------------------------------------|-------------------------------|-----------------------------------------------------------------------------------------------------------------------------------------------------------------------------------------------------------------------------------------------------------|----|--|
| 608 | Did you go to any of the following for help during last 12 months           |                               | YES                                                                                                                                                                                                                                                       | NO |  |
|     | a)                                                                          | Relatives from partner's side | 1                                                                                                                                                                                                                                                         | 2  |  |
|     | b)                                                                          | Relatives from own side       | 1                                                                                                                                                                                                                                                         | 2  |  |
|     | c)                                                                          | Neighbours                    | 1                                                                                                                                                                                                                                                         | 2  |  |
|     | d)                                                                          | Someone at work               | 1                                                                                                                                                                                                                                                         | 2  |  |
|     | e)                                                                          | Friends                       | 1                                                                                                                                                                                                                                                         | 2  |  |
|     | f)                                                                          | Police/court                  | 1                                                                                                                                                                                                                                                         | 2  |  |
|     | g)                                                                          | Hospital or health centre     | 1                                                                                                                                                                                                                                                         | 2  |  |
|     | h)                                                                          | Local leader                  | 1                                                                                                                                                                                                                                                         | 2  |  |
|     | i)                                                                          | NGOs (specify)                | 1                                                                                                                                                                                                                                                         | 2  |  |
|     | x)                                                                          | Anywhere else? (Specify)      | 1                                                                                                                                                                                                                                                         | 2  |  |
| 609 | Do you know from where one can get help for such experience? If yes, where? |                               | DON'T KNOW.....A<br>POLICE.....B<br>LAWYER.....C<br>COURT.....D<br>DOCTOR.....E<br>ONE STOP SERVICE CENTRE ...<br>.....F<br>VICTIM SUPPORT<br>CENTER(.....G<br>HELP LINE NO.....H<br>NGO (Specify) .....I<br>LOCAL LEADER.....J<br>OTHER (Specify) .....X |    |  |
|     | MARK ALL THAT APPLY.                                                        |                               |                                                                                                                                                                                                                                                           |    |  |

## SECTION 7 OTHER EXPERIENCES

In their lives, many women have unwanted experiences and experience different forms of maltreatment and violence from all kinds of people, men or women. These may be relatives, other people that they know, and/or strangers. If you don't mind, I would like to ask you about some of these situations. Everything that you say will be kept confidential.

| No.                                                                                                                                                                                                     | QUESTIONS & FILTERS                                                                                                                                                                                                                                                                                                                                                                                                                                                                                                                                                                                                                                                                                                                                                                                                                                                                                                                                                                                                                                                                                                                                   | CODING CATEGORIES                                                                                                                                                                                                                                                                                                                                                                                                                                                                                                                                                                                                                                                                                                                                                                                                                                                                                                                                                                                                                                                                                                                                                                                                                                            | SKIP TO |                                                    |   |         |     |                     |     |        |                                                                                                                                                                                                         |                |   |                    |   |                                                                                          |   |                        |   |                            |                                                         |                            |   |                          |   |                |   |                            |   |                  |   |                        |   |                       |   |  |  |
|---------------------------------------------------------------------------------------------------------------------------------------------------------------------------------------------------------|-------------------------------------------------------------------------------------------------------------------------------------------------------------------------------------------------------------------------------------------------------------------------------------------------------------------------------------------------------------------------------------------------------------------------------------------------------------------------------------------------------------------------------------------------------------------------------------------------------------------------------------------------------------------------------------------------------------------------------------------------------------------------------------------------------------------------------------------------------------------------------------------------------------------------------------------------------------------------------------------------------------------------------------------------------------------------------------------------------------------------------------------------------|--------------------------------------------------------------------------------------------------------------------------------------------------------------------------------------------------------------------------------------------------------------------------------------------------------------------------------------------------------------------------------------------------------------------------------------------------------------------------------------------------------------------------------------------------------------------------------------------------------------------------------------------------------------------------------------------------------------------------------------------------------------------------------------------------------------------------------------------------------------------------------------------------------------------------------------------------------------------------------------------------------------------------------------------------------------------------------------------------------------------------------------------------------------------------------------------------------------------------------------------------------------|---------|----------------------------------------------------|---|---------|-----|---------------------|-----|--------|---------------------------------------------------------------------------------------------------------------------------------------------------------------------------------------------------------|----------------|---|--------------------|---|------------------------------------------------------------------------------------------|---|------------------------|---|----------------------------|---------------------------------------------------------|----------------------------|---|--------------------------|---|----------------|---|----------------------------|---|------------------|---|------------------------|---|-----------------------|---|--|--|
| 701                                                                                                                                                                                                     | <p><b>Since the age of 15 until now, has anyone other than your husband ever forced you into sexual intercourse</b> when you did not want to, for example by threatening you, holding you down, or putting you in a situation where you could not say no. Remember to include people you have known as well as strangers. Please at this point exclude <b>attempts</b> to force you.</p> <p>IF NECESSARY: We define sexual intercourse as vaginal, oral or anal penetration.</p> <p>NOTE THAT THIS QUESTIONS IS ABOUT RAPES THAT ACTUALLY HAPPENED</p>                                                                                                                                                                                                                                                                                                                                                                                                                                                                                                                                                                                                | <p>YES .....1</p> <p>NO.....2 → <b>704</b></p>                                                                                                                                                                                                                                                                                                                                                                                                                                                                                                                                                                                                                                                                                                                                                                                                                                                                                                                                                                                                                                                                                                                                                                                                               |         |                                                    |   |         |     |                     |     |        |                                                                                                                                                                                                         |                |   |                    |   |                                                                                          |   |                        |   |                            |                                                         |                            |   |                          |   |                |   |                            |   |                  |   |                        |   |                       |   |  |  |
| 702                                                                                                                                                                                                     | <p>During the past 12 months, how many times <b>has anyone other than your husband ever forced you into sexual intercourse</b> when you did not want to?</p>                                                                                                                                                                                                                                                                                                                                                                                                                                                                                                                                                                                                                                                                                                                                                                                                                                                                                                                                                                                          | <p>NEVER.....1</p> <p>ONCE.....2</p> <p>FEW TIMES.....3</p> <p>MANY TIMES.....4</p>                                                                                                                                                                                                                                                                                                                                                                                                                                                                                                                                                                                                                                                                                                                                                                                                                                                                                                                                                                                                                                                                                                                                                                          |         |                                                    |   |         |     |                     |     |        |                                                                                                                                                                                                         |                |   |                    |   |                                                                                          |   |                        |   |                            |                                                         |                            |   |                          |   |                |   |                            |   |                  |   |                        |   |                       |   |  |  |
| 703                                                                                                                                                                                                     | <p>Who did this to you?</p> <p>PROBE: Anyone else? How about a relative? How about someone at school or work? How about a friend or neighbour? A stranger or anyone else?</p> <p><b>DO NOT READ OUT THE LIST. MARK LETTER FOR ALL MENTIONED.</b></p> <table border="1" style="width: 100%; border-collapse: collapse;"> <tr><td>FATHER</td><td>A</td></tr> <tr><td>FATHER-IN-LAW</td><td>B</td></tr> <tr><td>BROTHER</td><td>C</td></tr> <tr><td>OTHER FAMILY MEMBER</td><td>D</td></tr> <tr><td>COUSIN</td><td>E</td></tr> <tr><td>OTHER RELATIVE</td><td>F</td></tr> <tr><td>FAMILY MALE FREIND</td><td>G</td></tr> <tr><td>NEIGHBOUR (MALE)</td><td>H</td></tr> <tr><td>SOMEONE AT WORK (MALE)</td><td>I</td></tr> <tr><td>FRIEND/ACQUAINTANCE (MALE)</td><td>J</td></tr> <tr><td>RECENT ACQUAINTANCE (MALE)</td><td>K</td></tr> <tr><td>COMPLETE STRANGER (MALE)</td><td>L</td></tr> <tr><td>TEACHER (MALE)</td><td>M</td></tr> <tr><td>DOCTOR/HEALTH STAFF (MALE)</td><td>N</td></tr> <tr><td>RELIGIOUS LEADER</td><td>O</td></tr> <tr><td>POLICE/ SOLDIER (MALE)</td><td>P</td></tr> <tr><td>OTHER (specify) _____</td><td>X</td></tr> </table> | FATHER                                                                                                                                                                                                                                                                                                                                                                                                                                                                                                                                                                                                                                                                                                                                                                                                                                                                                                                                                                                                                                                                                                                                                                                                                                                       | A       | FATHER-IN-LAW                                      | B | BROTHER | C   | OTHER FAMILY MEMBER | D   | COUSIN | E                                                                                                                                                                                                       | OTHER RELATIVE | F | FAMILY MALE FREIND | G | NEIGHBOUR (MALE)                                                                         | H | SOMEONE AT WORK (MALE) | I | FRIEND/ACQUAINTANCE (MALE) | J                                                       | RECENT ACQUAINTANCE (MALE) | K | COMPLETE STRANGER (MALE) | L | TEACHER (MALE) | M | DOCTOR/HEALTH STAFF (MALE) | N | RELIGIOUS LEADER | O | POLICE/ SOLDIER (MALE) | P | OTHER (specify) _____ | X |  |  |
| FATHER                                                                                                                                                                                                  | A                                                                                                                                                                                                                                                                                                                                                                                                                                                                                                                                                                                                                                                                                                                                                                                                                                                                                                                                                                                                                                                                                                                                                     |                                                                                                                                                                                                                                                                                                                                                                                                                                                                                                                                                                                                                                                                                                                                                                                                                                                                                                                                                                                                                                                                                                                                                                                                                                                              |         |                                                    |   |         |     |                     |     |        |                                                                                                                                                                                                         |                |   |                    |   |                                                                                          |   |                        |   |                            |                                                         |                            |   |                          |   |                |   |                            |   |                  |   |                        |   |                       |   |  |  |
| FATHER-IN-LAW                                                                                                                                                                                           | B                                                                                                                                                                                                                                                                                                                                                                                                                                                                                                                                                                                                                                                                                                                                                                                                                                                                                                                                                                                                                                                                                                                                                     |                                                                                                                                                                                                                                                                                                                                                                                                                                                                                                                                                                                                                                                                                                                                                                                                                                                                                                                                                                                                                                                                                                                                                                                                                                                              |         |                                                    |   |         |     |                     |     |        |                                                                                                                                                                                                         |                |   |                    |   |                                                                                          |   |                        |   |                            |                                                         |                            |   |                          |   |                |   |                            |   |                  |   |                        |   |                       |   |  |  |
| BROTHER                                                                                                                                                                                                 | C                                                                                                                                                                                                                                                                                                                                                                                                                                                                                                                                                                                                                                                                                                                                                                                                                                                                                                                                                                                                                                                                                                                                                     |                                                                                                                                                                                                                                                                                                                                                                                                                                                                                                                                                                                                                                                                                                                                                                                                                                                                                                                                                                                                                                                                                                                                                                                                                                                              |         |                                                    |   |         |     |                     |     |        |                                                                                                                                                                                                         |                |   |                    |   |                                                                                          |   |                        |   |                            |                                                         |                            |   |                          |   |                |   |                            |   |                  |   |                        |   |                       |   |  |  |
| OTHER FAMILY MEMBER                                                                                                                                                                                     | D                                                                                                                                                                                                                                                                                                                                                                                                                                                                                                                                                                                                                                                                                                                                                                                                                                                                                                                                                                                                                                                                                                                                                     |                                                                                                                                                                                                                                                                                                                                                                                                                                                                                                                                                                                                                                                                                                                                                                                                                                                                                                                                                                                                                                                                                                                                                                                                                                                              |         |                                                    |   |         |     |                     |     |        |                                                                                                                                                                                                         |                |   |                    |   |                                                                                          |   |                        |   |                            |                                                         |                            |   |                          |   |                |   |                            |   |                  |   |                        |   |                       |   |  |  |
| COUSIN                                                                                                                                                                                                  | E                                                                                                                                                                                                                                                                                                                                                                                                                                                                                                                                                                                                                                                                                                                                                                                                                                                                                                                                                                                                                                                                                                                                                     |                                                                                                                                                                                                                                                                                                                                                                                                                                                                                                                                                                                                                                                                                                                                                                                                                                                                                                                                                                                                                                                                                                                                                                                                                                                              |         |                                                    |   |         |     |                     |     |        |                                                                                                                                                                                                         |                |   |                    |   |                                                                                          |   |                        |   |                            |                                                         |                            |   |                          |   |                |   |                            |   |                  |   |                        |   |                       |   |  |  |
| OTHER RELATIVE                                                                                                                                                                                          | F                                                                                                                                                                                                                                                                                                                                                                                                                                                                                                                                                                                                                                                                                                                                                                                                                                                                                                                                                                                                                                                                                                                                                     |                                                                                                                                                                                                                                                                                                                                                                                                                                                                                                                                                                                                                                                                                                                                                                                                                                                                                                                                                                                                                                                                                                                                                                                                                                                              |         |                                                    |   |         |     |                     |     |        |                                                                                                                                                                                                         |                |   |                    |   |                                                                                          |   |                        |   |                            |                                                         |                            |   |                          |   |                |   |                            |   |                  |   |                        |   |                       |   |  |  |
| FAMILY MALE FREIND                                                                                                                                                                                      | G                                                                                                                                                                                                                                                                                                                                                                                                                                                                                                                                                                                                                                                                                                                                                                                                                                                                                                                                                                                                                                                                                                                                                     |                                                                                                                                                                                                                                                                                                                                                                                                                                                                                                                                                                                                                                                                                                                                                                                                                                                                                                                                                                                                                                                                                                                                                                                                                                                              |         |                                                    |   |         |     |                     |     |        |                                                                                                                                                                                                         |                |   |                    |   |                                                                                          |   |                        |   |                            |                                                         |                            |   |                          |   |                |   |                            |   |                  |   |                        |   |                       |   |  |  |
| NEIGHBOUR (MALE)                                                                                                                                                                                        | H                                                                                                                                                                                                                                                                                                                                                                                                                                                                                                                                                                                                                                                                                                                                                                                                                                                                                                                                                                                                                                                                                                                                                     |                                                                                                                                                                                                                                                                                                                                                                                                                                                                                                                                                                                                                                                                                                                                                                                                                                                                                                                                                                                                                                                                                                                                                                                                                                                              |         |                                                    |   |         |     |                     |     |        |                                                                                                                                                                                                         |                |   |                    |   |                                                                                          |   |                        |   |                            |                                                         |                            |   |                          |   |                |   |                            |   |                  |   |                        |   |                       |   |  |  |
| SOMEONE AT WORK (MALE)                                                                                                                                                                                  | I                                                                                                                                                                                                                                                                                                                                                                                                                                                                                                                                                                                                                                                                                                                                                                                                                                                                                                                                                                                                                                                                                                                                                     |                                                                                                                                                                                                                                                                                                                                                                                                                                                                                                                                                                                                                                                                                                                                                                                                                                                                                                                                                                                                                                                                                                                                                                                                                                                              |         |                                                    |   |         |     |                     |     |        |                                                                                                                                                                                                         |                |   |                    |   |                                                                                          |   |                        |   |                            |                                                         |                            |   |                          |   |                |   |                            |   |                  |   |                        |   |                       |   |  |  |
| FRIEND/ACQUAINTANCE (MALE)                                                                                                                                                                              | J                                                                                                                                                                                                                                                                                                                                                                                                                                                                                                                                                                                                                                                                                                                                                                                                                                                                                                                                                                                                                                                                                                                                                     |                                                                                                                                                                                                                                                                                                                                                                                                                                                                                                                                                                                                                                                                                                                                                                                                                                                                                                                                                                                                                                                                                                                                                                                                                                                              |         |                                                    |   |         |     |                     |     |        |                                                                                                                                                                                                         |                |   |                    |   |                                                                                          |   |                        |   |                            |                                                         |                            |   |                          |   |                |   |                            |   |                  |   |                        |   |                       |   |  |  |
| RECENT ACQUAINTANCE (MALE)                                                                                                                                                                              | K                                                                                                                                                                                                                                                                                                                                                                                                                                                                                                                                                                                                                                                                                                                                                                                                                                                                                                                                                                                                                                                                                                                                                     |                                                                                                                                                                                                                                                                                                                                                                                                                                                                                                                                                                                                                                                                                                                                                                                                                                                                                                                                                                                                                                                                                                                                                                                                                                                              |         |                                                    |   |         |     |                     |     |        |                                                                                                                                                                                                         |                |   |                    |   |                                                                                          |   |                        |   |                            |                                                         |                            |   |                          |   |                |   |                            |   |                  |   |                        |   |                       |   |  |  |
| COMPLETE STRANGER (MALE)                                                                                                                                                                                | L                                                                                                                                                                                                                                                                                                                                                                                                                                                                                                                                                                                                                                                                                                                                                                                                                                                                                                                                                                                                                                                                                                                                                     |                                                                                                                                                                                                                                                                                                                                                                                                                                                                                                                                                                                                                                                                                                                                                                                                                                                                                                                                                                                                                                                                                                                                                                                                                                                              |         |                                                    |   |         |     |                     |     |        |                                                                                                                                                                                                         |                |   |                    |   |                                                                                          |   |                        |   |                            |                                                         |                            |   |                          |   |                |   |                            |   |                  |   |                        |   |                       |   |  |  |
| TEACHER (MALE)                                                                                                                                                                                          | M                                                                                                                                                                                                                                                                                                                                                                                                                                                                                                                                                                                                                                                                                                                                                                                                                                                                                                                                                                                                                                                                                                                                                     |                                                                                                                                                                                                                                                                                                                                                                                                                                                                                                                                                                                                                                                                                                                                                                                                                                                                                                                                                                                                                                                                                                                                                                                                                                                              |         |                                                    |   |         |     |                     |     |        |                                                                                                                                                                                                         |                |   |                    |   |                                                                                          |   |                        |   |                            |                                                         |                            |   |                          |   |                |   |                            |   |                  |   |                        |   |                       |   |  |  |
| DOCTOR/HEALTH STAFF (MALE)                                                                                                                                                                              | N                                                                                                                                                                                                                                                                                                                                                                                                                                                                                                                                                                                                                                                                                                                                                                                                                                                                                                                                                                                                                                                                                                                                                     |                                                                                                                                                                                                                                                                                                                                                                                                                                                                                                                                                                                                                                                                                                                                                                                                                                                                                                                                                                                                                                                                                                                                                                                                                                                              |         |                                                    |   |         |     |                     |     |        |                                                                                                                                                                                                         |                |   |                    |   |                                                                                          |   |                        |   |                            |                                                         |                            |   |                          |   |                |   |                            |   |                  |   |                        |   |                       |   |  |  |
| RELIGIOUS LEADER                                                                                                                                                                                        | O                                                                                                                                                                                                                                                                                                                                                                                                                                                                                                                                                                                                                                                                                                                                                                                                                                                                                                                                                                                                                                                                                                                                                     |                                                                                                                                                                                                                                                                                                                                                                                                                                                                                                                                                                                                                                                                                                                                                                                                                                                                                                                                                                                                                                                                                                                                                                                                                                                              |         |                                                    |   |         |     |                     |     |        |                                                                                                                                                                                                         |                |   |                    |   |                                                                                          |   |                        |   |                            |                                                         |                            |   |                          |   |                |   |                            |   |                  |   |                        |   |                       |   |  |  |
| POLICE/ SOLDIER (MALE)                                                                                                                                                                                  | P                                                                                                                                                                                                                                                                                                                                                                                                                                                                                                                                                                                                                                                                                                                                                                                                                                                                                                                                                                                                                                                                                                                                                     |                                                                                                                                                                                                                                                                                                                                                                                                                                                                                                                                                                                                                                                                                                                                                                                                                                                                                                                                                                                                                                                                                                                                                                                                                                                              |         |                                                    |   |         |     |                     |     |        |                                                                                                                                                                                                         |                |   |                    |   |                                                                                          |   |                        |   |                            |                                                         |                            |   |                          |   |                |   |                            |   |                  |   |                        |   |                       |   |  |  |
| OTHER (specify) _____                                                                                                                                                                                   | X                                                                                                                                                                                                                                                                                                                                                                                                                                                                                                                                                                                                                                                                                                                                                                                                                                                                                                                                                                                                                                                                                                                                                     |                                                                                                                                                                                                                                                                                                                                                                                                                                                                                                                                                                                                                                                                                                                                                                                                                                                                                                                                                                                                                                                                                                                                                                                                                                                              |         |                                                    |   |         |     |                     |     |        |                                                                                                                                                                                                         |                |   |                    |   |                                                                                          |   |                        |   |                            |                                                         |                            |   |                          |   |                |   |                            |   |                  |   |                        |   |                       |   |  |  |
| 704                                                                                                                                                                                                     | <p><b>Since the age of 15 until now, any of the following has happened to you? Remember to include people you have known as well as strangers.</b></p>                                                                                                                                                                                                                                                                                                                                                                                                                                                                                                                                                                                                                                                                                                                                                                                                                                                                                                                                                                                                | <table border="1" style="width: 100%; border-collapse: collapse;"> <tr> <th style="width: 10%;">A.</th><th colspan="2" style="width: 80%;">B.IF YES: Has this happened in the past 12 months?</th></tr> <tr> <th></th><th style="width: 20%;">YES</th><th style="width: 20%;">NO</th><th style="width: 20%;">YES</th><th style="width: 20%;">NO</th></tr> <tr> <td>a) Has anyone <b>attempted but NOT succeed to force</b> you into sexual intercourse when you did not want to, for example by holding you down or putting you in a situation where you could not say no?</td><td style="text-align: center;">1</td><td style="text-align: center;">2</td><td style="text-align: center;">1</td><td style="text-align: center;">2</td></tr> <tr> <td>b) Touched you sexually. This includes for example touching of breasts or private parts?</td><td style="text-align: center;">1</td><td style="text-align: center;">2</td><td style="text-align: center;">1</td><td style="text-align: center;">2</td></tr> <tr> <td>c) Made you touch their private parts against your will</td><td style="text-align: center;">1</td><td style="text-align: center;">2</td><td style="text-align: center;">1</td><td style="text-align: center;">2</td></tr> </table> | A.      | B.IF YES: Has this happened in the past 12 months? |   |         | YES | NO                  | YES | NO     | a) Has anyone <b>attempted but NOT succeed to force</b> you into sexual intercourse when you did not want to, for example by holding you down or putting you in a situation where you could not say no? | 1              | 2 | 1                  | 2 | b) Touched you sexually. This includes for example touching of breasts or private parts? | 1 | 2                      | 1 | 2                          | c) Made you touch their private parts against your will | 1                          | 2 | 1                        | 2 |                |   |                            |   |                  |   |                        |   |                       |   |  |  |
| A.                                                                                                                                                                                                      | B.IF YES: Has this happened in the past 12 months?                                                                                                                                                                                                                                                                                                                                                                                                                                                                                                                                                                                                                                                                                                                                                                                                                                                                                                                                                                                                                                                                                                    |                                                                                                                                                                                                                                                                                                                                                                                                                                                                                                                                                                                                                                                                                                                                                                                                                                                                                                                                                                                                                                                                                                                                                                                                                                                              |         |                                                    |   |         |     |                     |     |        |                                                                                                                                                                                                         |                |   |                    |   |                                                                                          |   |                        |   |                            |                                                         |                            |   |                          |   |                |   |                            |   |                  |   |                        |   |                       |   |  |  |
|                                                                                                                                                                                                         | YES                                                                                                                                                                                                                                                                                                                                                                                                                                                                                                                                                                                                                                                                                                                                                                                                                                                                                                                                                                                                                                                                                                                                                   | NO                                                                                                                                                                                                                                                                                                                                                                                                                                                                                                                                                                                                                                                                                                                                                                                                                                                                                                                                                                                                                                                                                                                                                                                                                                                           | YES     | NO                                                 |   |         |     |                     |     |        |                                                                                                                                                                                                         |                |   |                    |   |                                                                                          |   |                        |   |                            |                                                         |                            |   |                          |   |                |   |                            |   |                  |   |                        |   |                       |   |  |  |
| a) Has anyone <b>attempted but NOT succeed to force</b> you into sexual intercourse when you did not want to, for example by holding you down or putting you in a situation where you could not say no? | 1                                                                                                                                                                                                                                                                                                                                                                                                                                                                                                                                                                                                                                                                                                                                                                                                                                                                                                                                                                                                                                                                                                                                                     | 2                                                                                                                                                                                                                                                                                                                                                                                                                                                                                                                                                                                                                                                                                                                                                                                                                                                                                                                                                                                                                                                                                                                                                                                                                                                            | 1       | 2                                                  |   |         |     |                     |     |        |                                                                                                                                                                                                         |                |   |                    |   |                                                                                          |   |                        |   |                            |                                                         |                            |   |                          |   |                |   |                            |   |                  |   |                        |   |                       |   |  |  |
| b) Touched you sexually. This includes for example touching of breasts or private parts?                                                                                                                | 1                                                                                                                                                                                                                                                                                                                                                                                                                                                                                                                                                                                                                                                                                                                                                                                                                                                                                                                                                                                                                                                                                                                                                     | 2                                                                                                                                                                                                                                                                                                                                                                                                                                                                                                                                                                                                                                                                                                                                                                                                                                                                                                                                                                                                                                                                                                                                                                                                                                                            | 1       | 2                                                  |   |         |     |                     |     |        |                                                                                                                                                                                                         |                |   |                    |   |                                                                                          |   |                        |   |                            |                                                         |                            |   |                          |   |                |   |                            |   |                  |   |                        |   |                       |   |  |  |
| c) Made you touch their private parts against your will                                                                                                                                                 | 1                                                                                                                                                                                                                                                                                                                                                                                                                                                                                                                                                                                                                                                                                                                                                                                                                                                                                                                                                                                                                                                                                                                                                     | 2                                                                                                                                                                                                                                                                                                                                                                                                                                                                                                                                                                                                                                                                                                                                                                                                                                                                                                                                                                                                                                                                                                                                                                                                                                                            | 1       | 2                                                  |   |         |     |                     |     |        |                                                                                                                                                                                                         |                |   |                    |   |                                                                                          |   |                        |   |                            |                                                         |                            |   |                          |   |                |   |                            |   |                  |   |                        |   |                       |   |  |  |

|                 |                                                                                                                                                                                                                                                                                                                                      |                                                    |                 |             |
|-----------------|--------------------------------------------------------------------------------------------------------------------------------------------------------------------------------------------------------------------------------------------------------------------------------------------------------------------------------------|----------------------------------------------------|-----------------|-------------|
| CHE<br>CK7<br>A | AT LEAST ONE 'YES' ('1') MARKED IN COLUMN A. [ ]<br>↓<br>705                                                                                                                                                                                                                                                                         | ONLY 'NO' ('2') MARKED<br>[ ]⇒ ⇒ 706               |                 |             |
| 705             | Who did this to you?<br><br>PROBE:<br>Anyone else? How about a relative? How about someone at school or work? How about a friend or neighbour? A stranger or anyone else?<br><b>DO NOT READ OUT THE LIST</b><br><b>MARK LETTER FOR ALL MENTIONED</b>                                                                                 |                                                    |                 |             |
|                 | FATHER                                                                                                                                                                                                                                                                                                                               | A                                                  |                 |             |
|                 | FATHER-IN-LAW                                                                                                                                                                                                                                                                                                                        | B                                                  |                 |             |
|                 | BROTHER                                                                                                                                                                                                                                                                                                                              | C                                                  |                 |             |
|                 | OTHER FAMILY MEMBER                                                                                                                                                                                                                                                                                                                  | D                                                  |                 |             |
|                 | COUSIN                                                                                                                                                                                                                                                                                                                               | E                                                  |                 |             |
|                 | OTHER MALE RELATIVE                                                                                                                                                                                                                                                                                                                  | F                                                  |                 |             |
|                 | FAMILY MALE FREIND                                                                                                                                                                                                                                                                                                                   | G                                                  |                 |             |
|                 | NEIGHBOUR (MALE)                                                                                                                                                                                                                                                                                                                     | H                                                  |                 |             |
|                 | SOMEONE AT WORK (MALE)                                                                                                                                                                                                                                                                                                               | I                                                  |                 |             |
|                 | FRIEND/ACQUAINTANCE (MALE)                                                                                                                                                                                                                                                                                                           | J                                                  |                 |             |
|                 | RECENT ACQUAINTANCE (MALE)                                                                                                                                                                                                                                                                                                           | K                                                  |                 |             |
|                 | COMPLETE STRANGER (MALE)                                                                                                                                                                                                                                                                                                             | L                                                  |                 |             |
|                 | TEACHER (MALE)                                                                                                                                                                                                                                                                                                                       | M                                                  |                 |             |
|                 | DOCTOR/HEALTH STAFF (MALE)                                                                                                                                                                                                                                                                                                           | N                                                  |                 |             |
|                 | RELIGIOUS LEADER                                                                                                                                                                                                                                                                                                                     | O                                                  |                 |             |
|                 | POLICE/ SOLDIER (MALE)                                                                                                                                                                                                                                                                                                               | P                                                  |                 |             |
|                 | OTHER (specify) _____                                                                                                                                                                                                                                                                                                                | X                                                  |                 |             |
| 706             | Have you ever been asked to perform sexual acts or tolerate sexual touching against your will in order to get a job or keep your job, or to get promoted?                                                                                                                                                                            | YES .....1<br>NO .....2<br>REFUSED/NO ANSWER.....9 |                 |             |
| 707             | Have you been asked to perform sexual acts or tolerate sexual touching against your will at work in the last 12 months?                                                                                                                                                                                                              | YES .....1<br>NO .....2<br>REFUSED/NO ANSWER.....9 |                 |             |
|                 | There are many cases where your supervisor asks you to do something and you do it, even though you may not see clearly why it should be done. We are interested in finding out why you might do as your supervisor asks, so I will give you some possible reasons and would like you to tell me how likely each of these reasons is. |                                                    |                 |             |
| 708             | Social power scale                                                                                                                                                                                                                                                                                                                   | Very unlikely                                      | Somewhat likely | Very likely |
|                 | REWARD                                                                                                                                                                                                                                                                                                                               |                                                    |                 |             |
| A               | If you do not comply with your supervisor, you will not be rewarded                                                                                                                                                                                                                                                                  | 1                                                  | 2               | 3           |
| B               | The only reason for doing as supervisor suggests is to obtain good things in return                                                                                                                                                                                                                                                  | 1                                                  | 2               | 3           |
| C               | You want to do as supervisor suggests only because of the good things s/he will give you for complying                                                                                                                                                                                                                               | 1                                                  | 2               | 3           |
| D               | Your supervisor has the ability to reward you (in some manner) if you do as s/he suggests                                                                                                                                                                                                                                            | 1                                                  | 2               | 3           |
| E               | If you do not do as supervisor suggests you will not receive good things from her/him                                                                                                                                                                                                                                                | 1                                                  | 2               | 3           |
| F               | In this situation you are dependent on supervisor 's willingness to grant you good things                                                                                                                                                                                                                                            | 1                                                  | 2               | 3           |
|                 | COERCION                                                                                                                                                                                                                                                                                                                             |                                                    |                 |             |
| G               | Supervisor can harm you in some manner if you do not do as s/he suggests                                                                                                                                                                                                                                                             | 1                                                  | 2               | 3           |
| H               | If you do not do as supervisor suggests, s/he will punish you                                                                                                                                                                                                                                                                        | 1                                                  | 2               | 3           |
| I               | Something bad will happen to you if you don't do as supervisor requests and s/he finds out.                                                                                                                                                                                                                                          | 1                                                  | 2               | 3           |
| J               | You had better do as supervisor suggests in order to prevent something bad from happening to me.                                                                                                                                                                                                                                     | 1                                                  | 2               | 3           |

|            |                                                                                                                                           |               |                           |                               |                                          |
|------------|-------------------------------------------------------------------------------------------------------------------------------------------|---------------|---------------------------|-------------------------------|------------------------------------------|
| K          | Supervisor might do something which is unpleasant to those we do not do as s/he suggests                                                  | 1             | 2                         | 3                             |                                          |
|            | <b>LEGITIMATE</b>                                                                                                                         |               |                           |                               |                                          |
| L          | It is your duty to comply with supervisor                                                                                                 | 1             | 2                         | 3                             |                                          |
| M          | Because of supervisor 's position he has the right to influence your behaviour                                                            | 1             | 2                         | 3                             |                                          |
| N          | You are obligated to do as supervisor suggests                                                                                            | 1             | 2                         | 3                             |                                          |
| <b>709</b> | How often within the past 4 weeks have you experienced or witnessed a manager:                                                            | Never         | Once                      | 2-3 Times                     | Many Times                               |
| A          | Call a worker names                                                                                                                       | 0             | 1                         | 2                             | 3                                        |
| B          | Report a worker to some one more senior for punishment                                                                                    | 0             | 1                         | 2                             | 3                                        |
| C          | Scold a worker                                                                                                                            | 0             | 1                         | 2                             | 3                                        |
| D          | Make fun of a workerbecause of their appearance                                                                                           | 0             | 1                         | 2                             | 3                                        |
| E          | Make fun of a workerfor some other reason                                                                                                 | 0             | 1                         | 2                             | 3                                        |
| F          | Shout a worker                                                                                                                            | 0             | 1                         | 2                             | 3                                        |
| G          | Slap a worker                                                                                                                             | 0             | 1                         | 2                             | 3                                        |
| H          | Strike the head of a worker                                                                                                               | 0             | 1                         | 2                             | 3                                        |
| I          | Pull the hair of a worker                                                                                                                 | 0             | 1                         | 2                             | 3                                        |
| J          | Push or shove a worker                                                                                                                    | 0             | 1                         | 2                             | 3                                        |
| K          | Praise a workeror a line that was working very well                                                                                       | 0             | 1                         | 2                             | 3                                        |
| L          | Discuss with a workerproblems at home which make it hard for her to do overtime and found a solution for both of you                      | 0             | 1                         | 2                             | 3                                        |
| M          | Lowered production targets for a day after realising that there was particular difficulty in achieving them                               | 0             | 1                         | 2                             | 3                                        |
| N          | Discuss with the workerhow best to organize the work so that targets can be met                                                           | 0             | 1                         | 2                             | 3                                        |
| O          | Review the production targets to make sure they can be achieved in normal working hours                                                   | 0             | 1                         | 2                             | 3                                        |
| 710        | The next questions ask about difficulties you may have doing certain activities because of a <b>HEALTH PROBLEM</b> or injury you have had | No difficulty | Yes<br>Some<br>difficulty | Yes<br>A lot of<br>difficulty | Cannot do at<br>all                      |
| A          | Do you have difficulty seeing, even if wearing glasses?                                                                                   | 1             | 2                         | 3                             | 4                                        |
| B          | Do you have difficulty hearing?                                                                                                           | 1             | 2                         | 3                             | 4                                        |
| C          | Do you have difficulty walking or climbing steps ?                                                                                        | 1             | 2                         | 3                             | 4                                        |
| D          | Do you have difficulty remembering or concentrating?                                                                                      | 1             | 2                         | 3                             | 4                                        |
| E          | Do you have any difficulty washing all over or dressing?                                                                                  | 1             | 2                         | 3                             | 4                                        |
| F          | Do you have difficulty speaking?                                                                                                          | 1             | 2                         | 3                             | 4                                        |
| 711        | Please tell me if you own any of the following, either by yourself or with someone else:                                                  | NO            | YES<br>Own by self        | YES<br>Own with<br>others     | YES<br>Own by self<br>and with<br>others |
|            | a) Land                                                                                                                                   | 1             | 2                         | 3                             | 4                                        |
|            | b) House                                                                                                                                  | 1             | 2                         | 3                             | 4                                        |
|            | c) Business                                                                                                                               | 1             | 2                         | 3                             | 4                                        |
|            | d) Large household items (TV, bed, cooker)                                                                                                | 1             | 2                         | 3                             | 4                                        |
|            | e) Jewellery, gold or other valuables                                                                                                     | 1             | 2                         | 3                             | 4                                        |
|            | f) Savings in the bank                                                                                                                    | 1             | 2                         | 3                             | 4                                        |
|            | x) Other property, specify                                                                                                                | 1             | 2                         | 3                             | 4                                        |



## SECTION 8 COMPLETION OF INTERVIEW

|                                                             |                                                                                                                                                                                                                                                                                                                                                                                                                                                                                                                                                                                                                                                                                                                                                                                                                                                                                                                                                                                                                                                                                              |                                                                    |  |
|-------------------------------------------------------------|----------------------------------------------------------------------------------------------------------------------------------------------------------------------------------------------------------------------------------------------------------------------------------------------------------------------------------------------------------------------------------------------------------------------------------------------------------------------------------------------------------------------------------------------------------------------------------------------------------------------------------------------------------------------------------------------------------------------------------------------------------------------------------------------------------------------------------------------------------------------------------------------------------------------------------------------------------------------------------------------------------------------------------------------------------------------------------------------|--------------------------------------------------------------------|--|
| 801                                                         | We have now finished the interview. Do you have any comments, or is there anything else you like to add?                                                                                                                                                                                                                                                                                                                                                                                                                                                                                                                                                                                                                                                                                                                                                                                                                                                                                                                                                                                     |                                                                    |  |
| 802                                                         | I have asked you about many difficult things.<br>How has talking about these things made you felt?                                                                                                                                                                                                                                                                                                                                                                                                                                                                                                                                                                                                                                                                                                                                                                                                                                                                                                                                                                                           | GOOD/BETTER .....1<br>BAD/WORSE.....2<br>SAME/ NO DIFFERENCE.....3 |  |
|                                                             | <p><b><i>FINISH ONE – IF RESPONDENT HAS DISCLOSED PROBLEMS / VIOLENCE</i></b></p> <p>I would like to thank you very much for helping us. I appreciate the time that you have taken. I realise that these questions may have been difficult for you to answer, but it is only by hearing from women themselves that we can really understand about their health and experiences of violence.</p> <p>From what you have told us, I can tell that you have had some very difficult times in your life. No-one has the right to treat someone else in that way. However, from what you have told me I can see that you are strong, and have survived through some difficult circumstances.</p> <p><b><i>FINISH TWO - IF RESPONDENT HAS NOT DISCLOSED PROBLEMS / VIOLENCE</i></b></p> <p>I would like to thank you very much for helping us. I appreciate the time that you have taken. I realise that these questions may have been difficult for you to answer, but it is only by hearing from women themselves that we can really understand about women's health and experiences in life.</p> |                                                                    |  |
| <b>INTERVIEWER COMMENTS TO BE COMPLETED AFTER INTERVIEW</b> |                                                                                                                                                                                                                                                                                                                                                                                                                                                                                                                                                                                                                                                                                                                                                                                                                                                                                                                                                                                                                                                                                              |                                                                    |  |
